# Supplementary material for: Asymmetric Mannich reactions of imidazo[2,1-b]thiazole-derived nucleophiles with (SS)-N-tert-butanesulfinyl (3,3,3)-trifluoroacetaldimine
Source: Royal Society of Chemistry journal article supplement (doi:10.1039/c3ob41785a), 2013-01-01

## Supporting Information

### Asymmetric Mannich reactions of imidazo[2,1-*b*]thiazole-derived nucleophiles with (*S*<sub>5</sub>)-*N*-*tert*-butanesulfinyl (3,3,3)-trifluoroacetaldimine

Haibo Mei,<sup>a,c</sup> Chen Xie,<sup>a</sup> Lingmin Wu,<sup>a</sup> Vadim A. Soloshonok,<sup>d,e</sup> Jianlin Han,<sup>\*a,c</sup> and Yi  
Pan<sup>\*a,b</sup>

#### Table of Contents

|                                                                             | Page |
|-----------------------------------------------------------------------------|------|
| 1. General information-----                                                 | S2   |
| 2. Procedure for asymmetric addition of sulfinylimine -----                 | S2   |
| 3. Reaction of large scale application study -----                          | S7   |
| 4. X-ray crystallography for 3c-----                                        | S8   |
| 5. Conversion of 3a affording free chiral primary amine 4 -----             | S9   |
| 6. <sup>1</sup> H and <sup>13</sup> C NMR spectra for compound 3 and 4----- | S10  |

## 1. General information

All imine addition reactions were performed in oven-dried vials under N<sub>2</sub> atmosphere. Solvent THF was dried and distilled prior to use. Imidazo[2,1-*b*]thiazoles **2** were synthesized according to literature<sup>1</sup>. Sulfinylimine **1** was obtained from Accela ChemBio Co., Ltd.. LDA (2 M in THF) was from Aldrich. These and other chemicals were used as obtained from commercial sources without further purification. Flash chromatography was performed using silica gel 60 (200-300 mesh). Thin layer chromatography was carried out on silica gel 60 F-254 TLC plates of 20 cm × 20 cm. Melting points are uncorrected. Values of optical rotation were measured on Rudolph Automatic Polarimeter A21101. <sup>1</sup>H, <sup>13</sup>C and <sup>19</sup>F NMR spectra were recorded on a Bruker AVANCE400M spectrometer. HRMS spectra were carried out at Micromass GCT (TOF MS EI<sup>+</sup>).

## Reference

1 G. L. Huang, H. S. Sun, X. J. Qiu, C. Jin, C. Lin, Y. Z. Shen, J. L. Jiang and L. Y. Wang, *Org. Lett.*, 2011, **13**, 5224-5227.

## 2. Typical procedure for asymmetric addition of sulfinylimine

Into an oven-dried reaction vial flushed with N<sub>2</sub> were taken compound **2** (0.85 mmol) and anhydrous THF (3.0 mL). The reaction vial was cooled to -78 °C and LDA (2 M in THF, 0.39 mL) was added dropwise with stirring. After 1 h at -78 °C, sulfinylimine **1** (0.5 mmol) dissolved in anhydrous THF (2.0 mL) was added dropwise. Stirring was continued at -78 °C for 2 h, then the reaction was quenched with saturated NH<sub>4</sub>Cl (3.0 mL), followed by H<sub>2</sub>O (5.0 mL) and the mixture was brought to room temperature. The organic layer was taken and the aqueous layer was extracted with EtOAc (2 × 20 mL). The combined organic layers were dried with anhydrous Na<sub>2</sub>SO<sub>4</sub>, filtered and the solvent was removed to give the crude product, which was purified by TLC plate (hexane/EtOAc, 2:3).

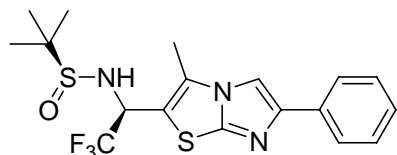

Compound **3a**: white solid, mp 186-188 °C,  $[\alpha]_D^{25} +157.0$  (*c* 0.76, CHCl<sub>3</sub>). <sup>1</sup>H NMR (CDCl<sub>3</sub>, 400 MHz):  $\delta$  = 7.82-7.85 (m, 2 H), 7.63 (s, 1 H), 7.41 (t, *J* = 8.0 Hz, 2 H), 7.26-7.31 (m, 1 H), 5.17-5.23 (m, 1 H), 3.90 (s, 1 H), 2.51 (s, 3 H), 1.27 (s, 9 H). <sup>13</sup>C NMR (CDCl<sub>3</sub>, 100 MHz):  $\delta$  = 148.7, 147.8, 133.8, 129.8, 128.7, 127.6, 125.3, 122.5 (q, *J* = 280.0 Hz), 114.4, 106.2, 56.8, 54.5 (q, *J* = 33.0 Hz), 22.4, 12.1. <sup>19</sup>F NMR (CDCl<sub>3</sub>, 376 MHz):  $\delta$  = -74.0. HRMS (TOF MS EI<sup>+</sup>) *m/z*: calcd for [C<sub>18</sub>H<sub>20</sub>N<sub>3</sub>OF<sub>3</sub>S<sub>2</sub>] 415.1000, found 415.1002.

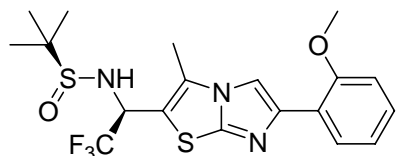

Compound **3b**: yellow solid, mp 76-78 °C,  $[\alpha]_D^{25} +135.4$  (*c* 0.26, CHCl<sub>3</sub>). <sup>1</sup>H NMR (CDCl<sub>3</sub>, 400 MHz):  $\delta$  = 8.25 (d, *J* = 8.0 Hz, 1 H), 7.92 (s, 1 H), 7.26 (s, 1 H), 7.07 (t, *J* = 8.0 Hz, 1 H), 7.00 (d, *J* = 8.0 Hz, 1 H), 5.20 (d, *J* = 4.0 Hz, 1 H), 3.99 (s, 3 H), 3.84 (s, 1H), 2.54 (s, 3 H), 1.27 (s, 9 H). <sup>13</sup>C NMR (CDCl<sub>3</sub>, 100 MHz):  $\delta$  = 156.1, 147.7, 143.1, 129.9, 128.2, 128.1, 125.3 (d, *J* = 280.0 Hz), 122.4, 121.0, 113.8, 110.8, 110.5, 56.7, 55.4, 54.6 (q, *J* = 32.0 Hz), 22.4, 12.1. <sup>19</sup>F NMR (CDCl<sub>3</sub>, 376 MHz):  $\delta$  = -74.1. HRMS (TOF MS EI<sup>+</sup>) *m/z*: calcd for [C<sub>19</sub>H<sub>22</sub>N<sub>3</sub>O<sub>2</sub>F<sub>3</sub>S<sub>2</sub>] 445.1106, found 445.1101.

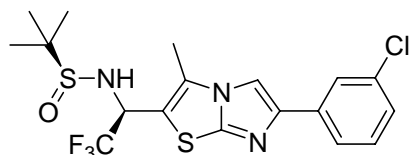

Compound **3c**: white solid, mp 225-227 °C,  $[\alpha]_D^{25} +144.7$  (*c* 0.26, CHCl<sub>3</sub>). <sup>1</sup>H NMR (CDCl<sub>3</sub>, 400 MHz):  $\delta$  = 7.84 (t, *J* = 1.6 Hz, 1 H), 7.72 (d, *J* = 8.0 Hz, 1 H), 7.65 (s, 1 H), 7.33 (t, *J* = 8.0 Hz, 1 H), 7.25-7.27 (m, 1 H), 5.17-5.22 (m, 1 H), 3.88 (s, 1 H), 2.53 (s, 3 H), 1.28 (s, 9 H). <sup>13</sup>C NMR (CDCl<sub>3</sub>, 100 MHz):  $\delta$  = 149.0, 146.4, 135.6, 134.7, 130.0, 129.7, 127.6, 125.4, 125.3 (q, *J* = 280.0 Hz), 123.3, 114.9, 106.7, 56.8,

54.5 (q,  $J = 32.0$  Hz), 22.4, 12.2.  $^{19}\text{F}$  NMR ( $\text{CDCl}_3$ , 376 MHz):  $\delta = -74.0$ . HRMS (TOF MS  $\text{EI}^+$ )  $m/z$ : calcd for  $[\text{C}_{18}\text{H}_{19}\text{N}_3\text{OF}_3\text{S}_2\text{Cl}]$  449.0610, found 449.0602.

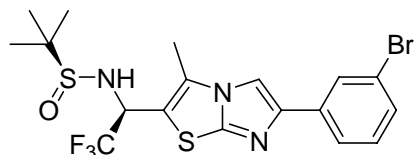

Compound **3d**: white solid, mp 226-227 °C,  $[\alpha]_{\text{D}}^{25} +125.4$  ( $c$  0.24,  $\text{CHCl}_3$ ).  $^1\text{H}$  NMR ( $\text{CDCl}_3$ , 400 MHz):  $\delta = 8.00$  (t,  $J = 1.6$  Hz, 1 H), 7.77 (d,  $J = 8.0$  Hz, 1 H), 7.64 (s, 1 H), 7.41-7.43 (m, 1 H), 7.25-7.29 (m, 1 H), 5.17-5.22 (m, 1 H), 3.86 (s, 1 H), 2.53 (s, 3 H), 1.28 (s, 9 H).  $^{13}\text{C}$  NMR ( $\text{CDCl}_3$ , 100 MHz):  $\delta = 148.9$ , 146.3, 135.9, 130.5, 130.2, 129.8, 128.3, 125.3 (q,  $J = 280.0$  Hz), 123.8, 122.9, 114.9, 106.7, 56.8, 54.5 (q,  $J = 33.0$  Hz), 22.4, 12.2.  $^{19}\text{F}$  NMR ( $\text{CDCl}_3$ , 376 MHz):  $\delta = -74.0$ . HRMS (TOF MS  $\text{EI}^+$ )  $m/z$ : calcd for  $[\text{C}_{18}\text{H}_{19}\text{N}_3\text{OF}_3\text{S}_2\text{Br}]$  493.0105, found 493.0108.

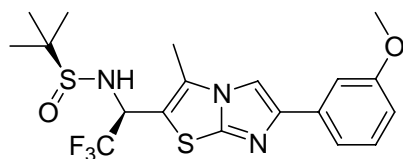

Compound **3e**: yellow solid, mp 165-167 °C,  $[\alpha]_{\text{D}}^{25} +152.4$  ( $c$  0.21,  $\text{CHCl}_3$ ).  $^1\text{H}$  NMR ( $\text{CDCl}_3$ , 400 MHz):  $\delta = 7.63$  (s, 1 H), 7.38-7.43 (m, 2 H), 7.26-7.33 (m, 1 H), 5.85-5.87 (m, 1 H), 3.88 (s, 3 H), 3.86 (s, 1 H), 2.52 (s, 3 H), 1.28 (s, 9 H).  $^{13}\text{C}$  NMR ( $\text{CDCl}_3$ , 100 MHz):  $\delta = 160.0$ , 148.6, 147.6, 135.2, 129.8, 129.7, 125.3 (q,  $J = 280.0$  Hz), 117.7, 114.5, 113.8, 110.4, 106.5, 56.8, 55.3, 54.5 (q,  $J = 32.0$  Hz), 22.4, 12.1.  $^{19}\text{F}$  NMR ( $\text{CDCl}_3$ , 376 MHz):  $\delta = -74.1$ . HRMS (TOF MS  $\text{EI}^+$ )  $m/z$ : calcd for  $[\text{C}_{19}\text{H}_{22}\text{N}_3\text{O}_2\text{F}_3\text{S}_2]$  445.1106, found 445.1108.

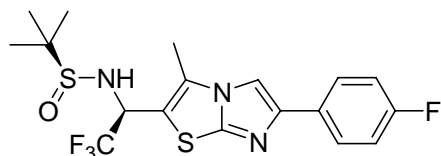

Compound **3f**: white solid, mp 169-170 °C,  $[\alpha]_{\text{D}}^{25} +152.6$  ( $c$  0.26,  $\text{CHCl}_3$ ).  $^1\text{H}$  NMR ( $\text{CDCl}_3$ , 400 MHz):  $\delta = 7.78$ -7.82 (m, 2 H), 7.58 (s, 1 H), 7.10 (t,  $J = 8.0$  Hz, 2 H), 5.17-5.22 (m, 1 H), 3.85 (s, 1 H), 2.52 (s, 3 H), 1.28 (s, 9 H).  $^{13}\text{C}$  NMR ( $\text{CDCl}_3$ , 100

MHz):  $\delta = 163.7, 161.2, 148.8, 147.0, 130.0$  (d,  $J = 27.0$  Hz),  $127.0$  (d,  $J = 8.0$  Hz),  $125.3$  (q,  $J = 280.0$  Hz),  $115.7$  (d,  $J = 21.0$  Hz),  $114.4, 105.9, 56.8, 54.5$  (q,  $J = 32.0$  Hz),  $22.4, 12.1$ .  $^{19}\text{F}$  NMR ( $\text{CDCl}_3$ , 376 MHz):  $\delta = -74.1, -114.5$ . HRMS (TOF MS  $\text{EI}^+$ )  $m/z$ : calcd for  $[\text{C}_{18}\text{H}_{19}\text{N}_3\text{OF}_4\text{S}_2]$  433.0906, found 433.0897.

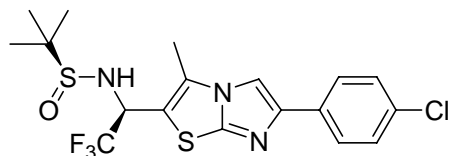

Compound **3g**: white solid, mp 190-192 °C,  $[\alpha]_{\text{D}}^{25} +149.3$  ( $c$  0.27,  $\text{CHCl}_3$ ).  $^1\text{H}$  NMR ( $\text{CDCl}_3$ , 400 MHz):  $\delta = 7.77$  (d,  $J = 8.0$  Hz, 2 H),  $7.62$  (s, 1 H),  $7.38$  (d,  $J = 8.0$  Hz, 2 H),  $5.18$ - $5.23$  (m, 1 H),  $3.94$  (s, 1 H),  $2.51$  (d,  $J = 1.2$  Hz, 3 H),  $1.27$  (s, 9 H).  $^{13}\text{C}$  NMR ( $\text{CDCl}_3$ , 100 MHz):  $\delta = 148.9, 146.7, 133.3, 132.3, 129.7, 128.9, 126.6, 125.3$  (q,  $J = 280.0$  Hz),  $114.7, 106.3, 56.8, 54.5$  (q,  $J = 32.0$  Hz),  $22.4, 12.1$ .  $^{19}\text{F}$  NMR ( $\text{CDCl}_3$ , 376 MHz):  $\delta = -74.0$ . HRMS (TOF MS  $\text{EI}^+$ )  $m/z$ : calcd for  $[\text{C}_{18}\text{H}_{19}\text{N}_3\text{OF}_3\text{S}_2\text{Cl}]$  449.0610, found 449.0600.

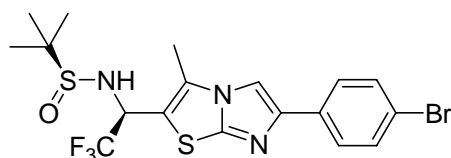

Compound **3h**: white solid, mp 193-194 °C,  $[\alpha]_{\text{D}}^{25} +134.9$  ( $c$  0.22,  $\text{CHCl}_3$ ).  $^1\text{H}$  NMR ( $\text{CDCl}_3$ , 400 MHz):  $\delta = 7.72$  (d,  $J = 8.0$  Hz, 2 H),  $7.63$  (s, 1 H),  $7.54$  (d,  $J = 8.0$  Hz, 2 H),  $5.17$ - $5.21$  (m, 1 H),  $3.88$  (s, 1 H),  $2.52$  (s, 3 H),  $1.28$  (s, 9 H).  $^{13}\text{C}$  NMR ( $\text{CDCl}_3$ , 100 MHz):  $\delta = 148.9, 146.7, 132.8, 131.8, 129.7, 126.8, 125.3$  (q,  $J = 280.0$  Hz),  $121.4, 114.7, 106.4, 56.8, 54.5$  (q,  $J = 33.0$  Hz),  $22.4, 12.1$ .  $^{19}\text{F}$  NMR ( $\text{CDCl}_3$ , 376 MHz):  $\delta = -74.0$ . HRMS (TOF MS  $\text{EI}^+$ )  $m/z$ : calcd for  $[\text{C}_{18}\text{H}_{19}\text{N}_3\text{OF}_3\text{S}_2\text{Br}]$  493.0105, found 493.0108.

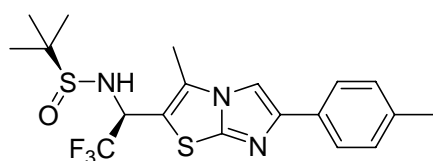

Compound **3i**: white solid, mp 200-202 °C,  $[\alpha]_{\text{D}}^{25} +159.7$  ( $c$  0.23,  $\text{CHCl}_3$ ).  $^1\text{H}$  NMR

(CDCl<sub>3</sub>, 400 MHz):  $\delta$  = 7.74 (d,  $J$  = 8.0 Hz, 2 H), 7.59 (s, 1 H), 7.23 (d,  $J$  = 8.0 Hz, 2 H), 5.16-5.22 (m, 1 H), 3.86 (s, 1 H), 2.52 (s, 3 H), 2.38 (s, 3 H), 1.27 (s, 9 H). <sup>13</sup>C NMR (CDCl<sub>3</sub>, 100 MHz):  $\delta$  = 148.6, 147.9, 137.4, 131.0, 129.8, 129.4, 125.2, 122.5 (q,  $J$  = 281.0 Hz), 114.2, 105.8, 56.8, 54.5 (q,  $J$  = 32.0 Hz), 22.4, 21.2, 12.1. <sup>19</sup>F NMR (CDCl<sub>3</sub>, 376 MHz):  $\delta$  = -74.1. HRMS (TOF MS EI<sup>+</sup>)  $m/z$ : calcd for [C<sub>19</sub>H<sub>22</sub>N<sub>3</sub>OF<sub>3</sub>S<sub>2</sub>] 429.1156, found 429.1157.

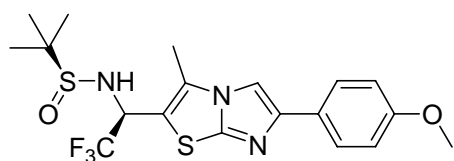

Compound **3j**: yellow solid, mp 141-142 °C, [ $\alpha$ ]<sub>D</sub><sup>25</sup> +147.6 (*c* 0.21, CHCl<sub>3</sub>). <sup>1</sup>H NMR (CDCl<sub>3</sub>, 400 MHz):  $\delta$  = 7.77 (d,  $J$  = 8.0 Hz, 2 H), 7.54 (s, 1 H), 6.96 (d,  $J$  = 8.0 Hz, 2 H), 5.17-5.21 (m, 1 H), 3.91 (s, 1 H), 3.84 (s, 3 H), 2.50 (s, 3 H), 1.27 (s, 9 H). <sup>13</sup>C NMR (CDCl<sub>3</sub>, 100 MHz):  $\delta$  = 159.3, 148.6, 147.8, 129.8, 126.6, 122.5 (q,  $J$  = 280.0 Hz), 114.2, 113.9, 105.2, 56.7, 55.3, 54.5 (q,  $J$  = 32.0 Hz), 22.4, 12.1. <sup>19</sup>F NMR (CDCl<sub>3</sub>, 376 MHz):  $\delta$  = -74.1. HRMS (TOF MS EI<sup>+</sup>)  $m/z$ : calcd for [C<sub>19</sub>H<sub>22</sub>N<sub>3</sub>O<sub>2</sub>F<sub>3</sub>S<sub>2</sub>] 445.1106, found 445.1107.

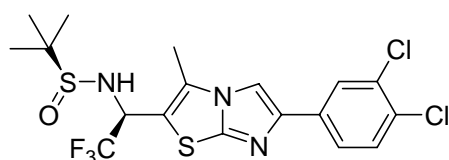

Compound **3k**: yellow solid, mp 146-148 °C, [ $\alpha$ ]<sub>D</sub><sup>25</sup> +146.7 (*c* 0.21, CHCl<sub>3</sub>). <sup>1</sup>H NMR (CDCl<sub>3</sub>, 400 MHz):  $\delta$  = 7.95 (d,  $J$  = 4.0 Hz, 1 H), 7.66 (dd,  $J$  = 4.0, 8.0 Hz, 1 H), 7.64 (s, 1 H), 7.48 (d,  $J$  = 8.0 Hz, 1 H), 5.17-5.22 (m, 1 H), 3.86 (s, 1 H), 2.53 (s, 3 H), 1.28 (s, 9 H). <sup>13</sup>C NMR (CDCl<sub>3</sub>, 100 MHz):  $\delta$  = 149.0, 145.4, 133.9, 132.9, 131.2, 130.6, 129.7, 127.0, 124.4, 122.4 (q,  $J$  = 280.0 Hz), 115.1, 106.8, 56.8, 54.5 (q,  $J$  = 32.0 Hz), 22.4, 12.1. <sup>19</sup>F NMR (CDCl<sub>3</sub>, 376 MHz):  $\delta$  = -74.0. HRMS (TOF MS EI<sup>+</sup>)  $m/z$ : calcd for [C<sub>18</sub>H<sub>18</sub>N<sub>3</sub>OF<sub>3</sub>S<sub>2</sub>Cl<sub>2</sub>] 483.0220, found 483.0226.

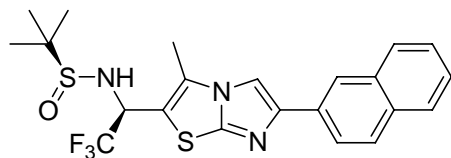

Compound **3l**: white solid, mp 199-201 °C,  $[\alpha]_D^{25} +164.1$  ( $c$  0.28,  $\text{CHCl}_3$ ).  $^1\text{H}$  NMR ( $\text{CDCl}_3$ , 400 MHz):  $\delta$  = 8.38 (s, 1 H), 7.86-7.90 (m, 3 H), 7.84 (d,  $J$  = 8.0 Hz, 1 H), 7.75 (s, 1 H), 7.44-7.50 (m, 2 H), 5.19-5.23 (m, 1 H), 3.88 (s, 1 H), 2.55 (s, 3 H), 1.29 (s, 9 H).  $^{13}\text{C}$  NMR ( $\text{CDCl}_3$ , 100 MHz):  $\delta$  = 149.0, 147.8, 133.7, 133.0, 131.0, 129.8, 128.4, 128.2, 127.7, 126.3, 125.9, 123.9, 123.6, 122.5 (q,  $J$  = 280.0 Hz), 114.5, 106.6, 56.8, 54.5 (q,  $J$  = 33.0 Hz), 22.4, 12.2.  $^{19}\text{F}$  NMR ( $\text{CDCl}_3$ , 376 MHz):  $\delta$  = -74.0. HRMS (TOF MS  $\text{EI}^+$ )  $m/z$ : calcd for  $[\text{C}_{22}\text{H}_{22}\text{N}_3\text{OF}_3\text{S}_2]$  465.1156, found 465.1151.

### 3. Reaction of large scale application study

Into an oven-dried round-bottom flask flushed with  $\text{N}_2$  were taken compound **2a** (8.5 mmol) and anhydrous THF (20.0 mL). The reaction flask was cooled to -78 °C and LDA (2 M in THF, 3.9 mL) was added dropwise with stirring. After 1 h at -78 °C, sulfinylimine **1** (5 mmol) dissolved in anhydrous THF (10.0 mL) was added dropwise. Stirring was continued at -78 °C for 2.5 h, then the reaction was quenched with saturated  $\text{NH}_4\text{Cl}$  (10.0 mL), followed by  $\text{H}_2\text{O}$  (15.0 mL) and the mixture was brought to room temperature. The organic layer was taken and the aqueous layer was extracted with EtOAc (2 × 30 mL). The combined organic layers were dried with anhydrous  $\text{Na}_2\text{SO}_4$ , filtered and the solvent was removed to give the crude product, which was purified by column chromatography (hexane/EtOAc, 1:1).

#### 4. X-ray crystallography for 3c

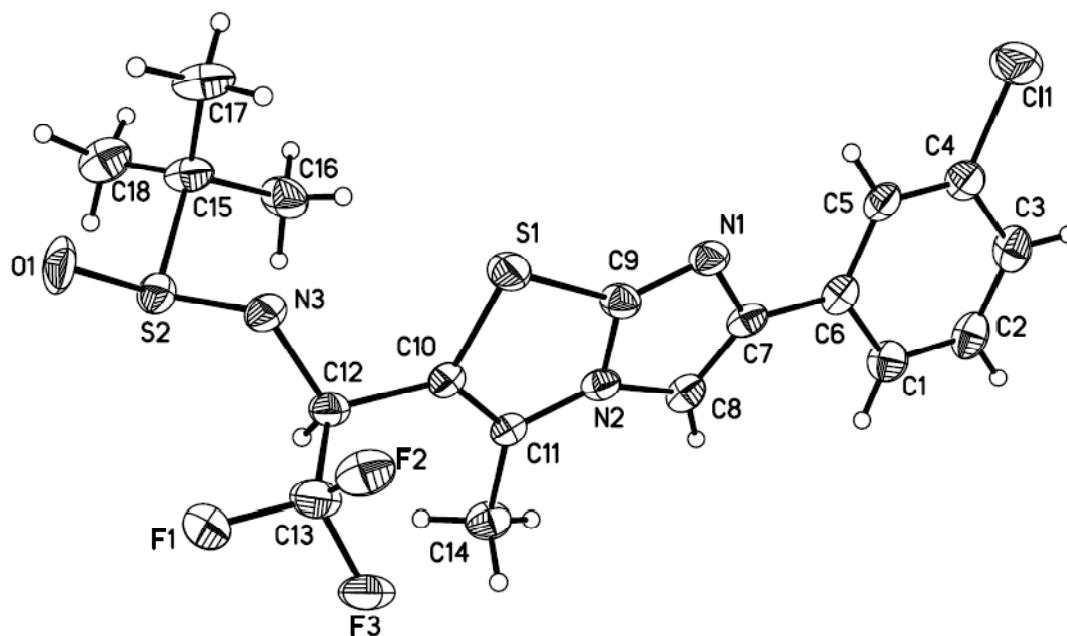

**Fig. 1** ORTEP structure of compound **3c**. (CCDC number 941569).



## 5. Conversion of 3a affording free chiral primary amine 4

**3a** (0.5 mmol) and MeOH (5.0 mL) were placed in a 25 mL round-bottom flask and aq HCl (36%, 1 mL) was added. The reaction was stirred at r.t. for 8 h, during which time the cleavage was monitored by TLC. Volatiles were removed under reduced pressure. The residue was dissolved in CH<sub>2</sub>Cl<sub>2</sub> (10.0 mL) and Et<sub>3</sub>N (15 mmol) was added. The reaction was stirred at r.t. for 1 h then H<sub>2</sub>O (10.0 mL) was added. The organic layer was taken, washed with H<sub>2</sub>O (2 × 10 mL), dried with anhydrous Na<sub>2</sub>SO<sub>4</sub>, filtered and the solvent was removed to give the crude product, which was purified by TLC plate (hexane/EtOAc, 2:3).

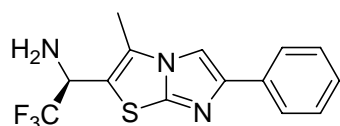

Compound **4**: white solid, mp 119-121 °C,  $[\alpha]_{\text{D}}^{25} +33.3$  (*c* 0.20, CHCl<sub>3</sub>). <sup>1</sup>H NMR (CDCl<sub>3</sub>, 400 MHz):  $\delta$  = 7.83 (d, *J* = 8.0 Hz, 2 H), 7.56 (s, 1 H), 7.40 (t, *J* = 8.0 Hz, 2 H), 7.28 (t, *J* = 8.0 Hz, 1 H), 4.72 (q, *J* = 8.0 Hz, 1 H), 2.41 (s, 3 H), 1.90 (s, 2 H). <sup>13</sup>C NMR (CDCl<sub>3</sub>, 100 MHz):  $\delta$  = 148.3, 147.2, 133.9, 128.7, 127.5, 126.7, 125.1, 123.5 (q, *J* = 280.0 Hz), 118.9, 105.8, 52.6 (q, *J* = 32.0 Hz), 12.0. <sup>19</sup>F NMR (CDCl<sub>3</sub>, 376 MHz):  $\delta$  = -76.8. HRMS (TOF MS EI<sup>+</sup>) *m/z*: calcd for [C<sub>14</sub>H<sub>12</sub>N<sub>3</sub>F<sub>3</sub>S] 311.0704, found 311.0696.

## 6. $^1\text{H}$ and $^{13}\text{C}$ NMR spectra for compound 3 and 4

### $^1\text{H}$ and $^{13}\text{C}$ NMR of 3a

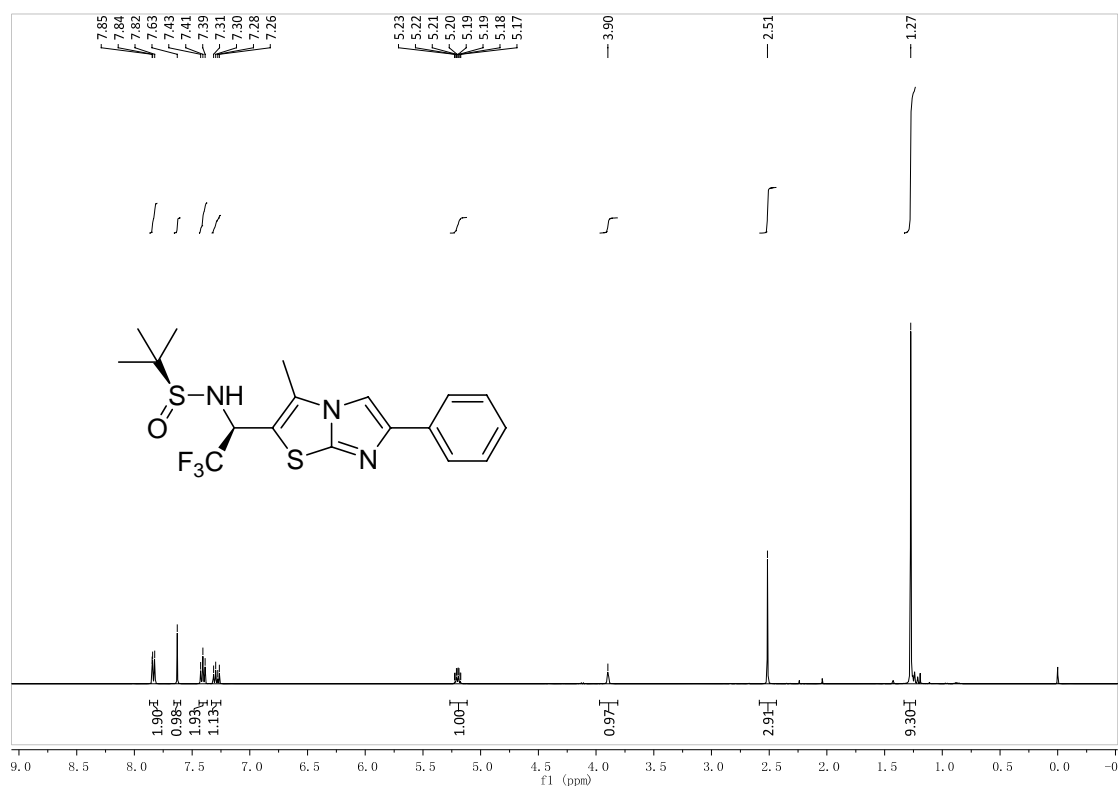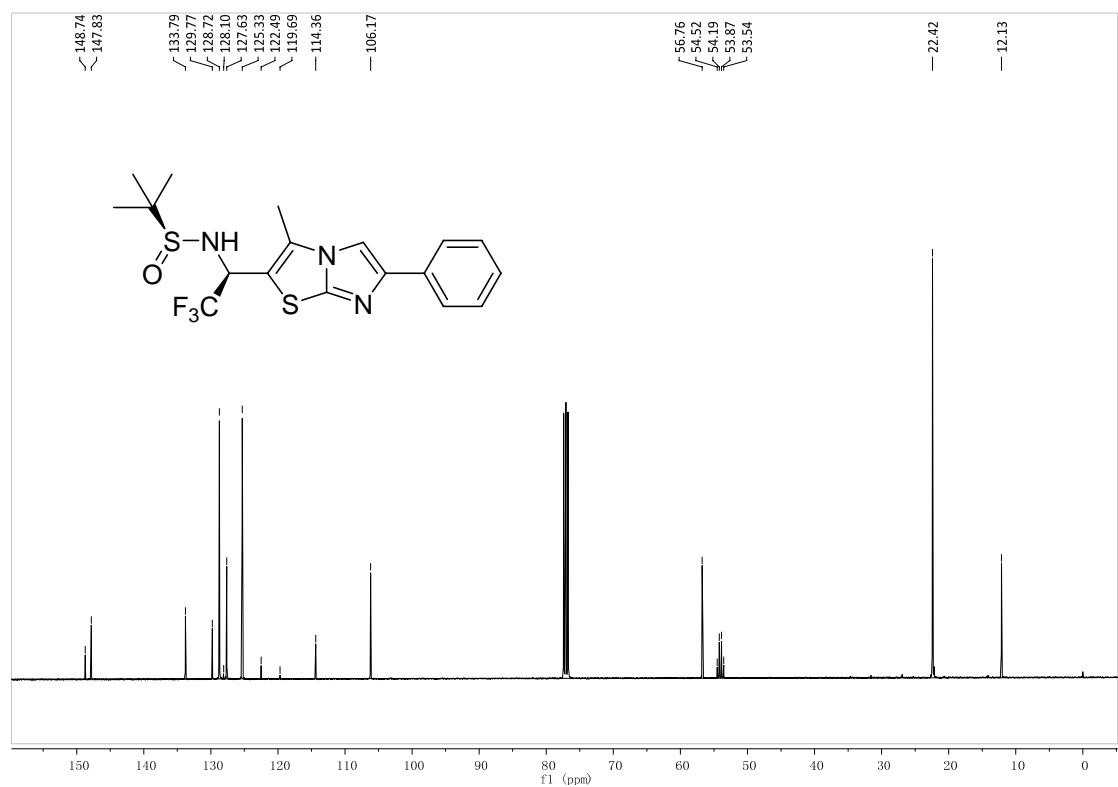

### $^1\text{H}$ and $^{13}\text{C}$ NMR of 3b

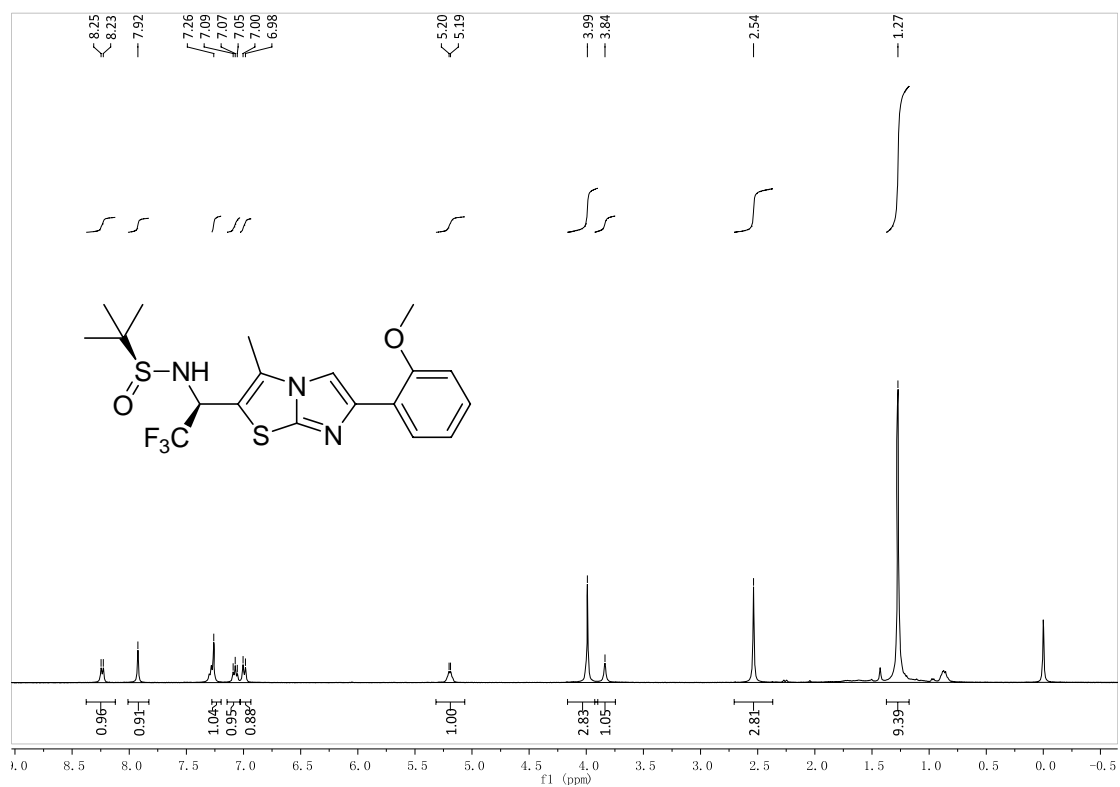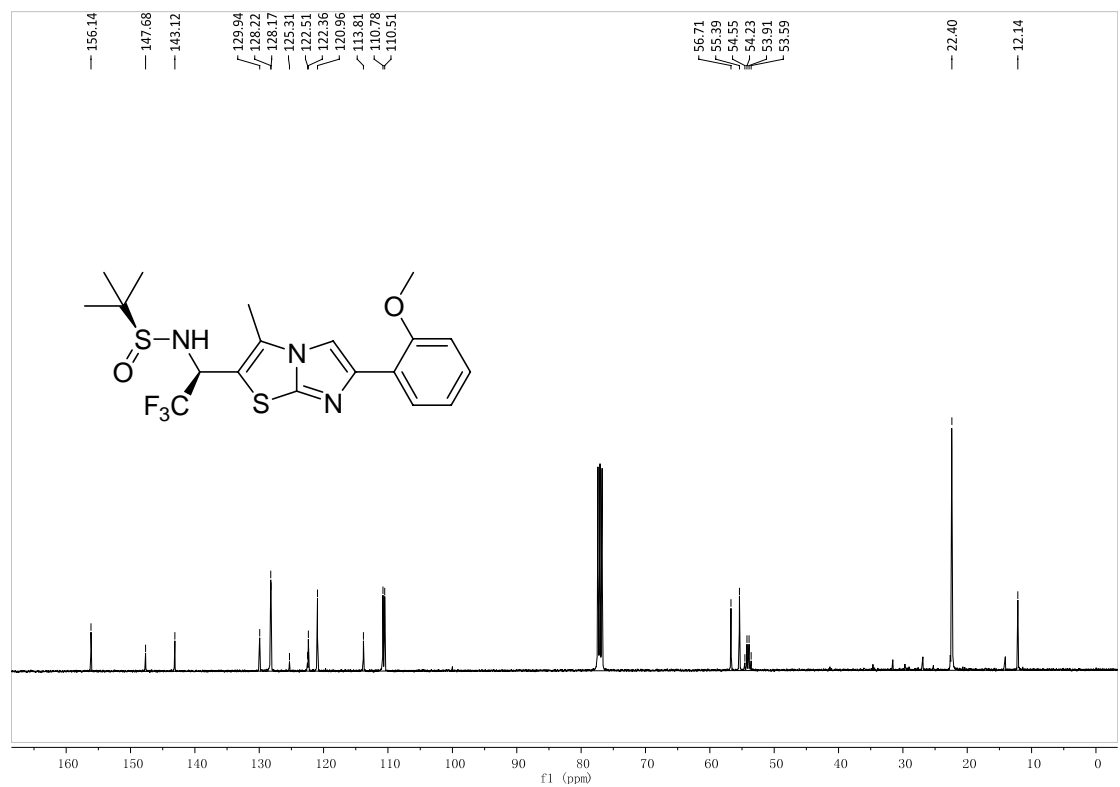

### $^1\text{H}$ and $^{13}\text{C}$ NMR of 3c

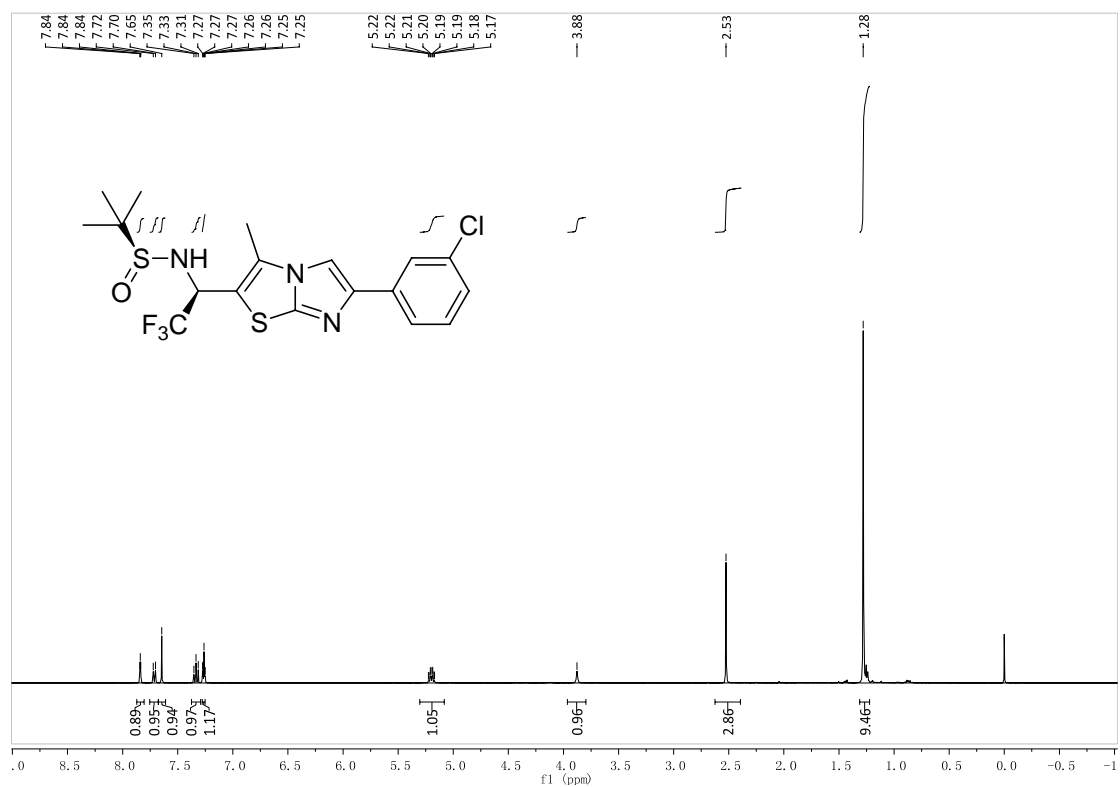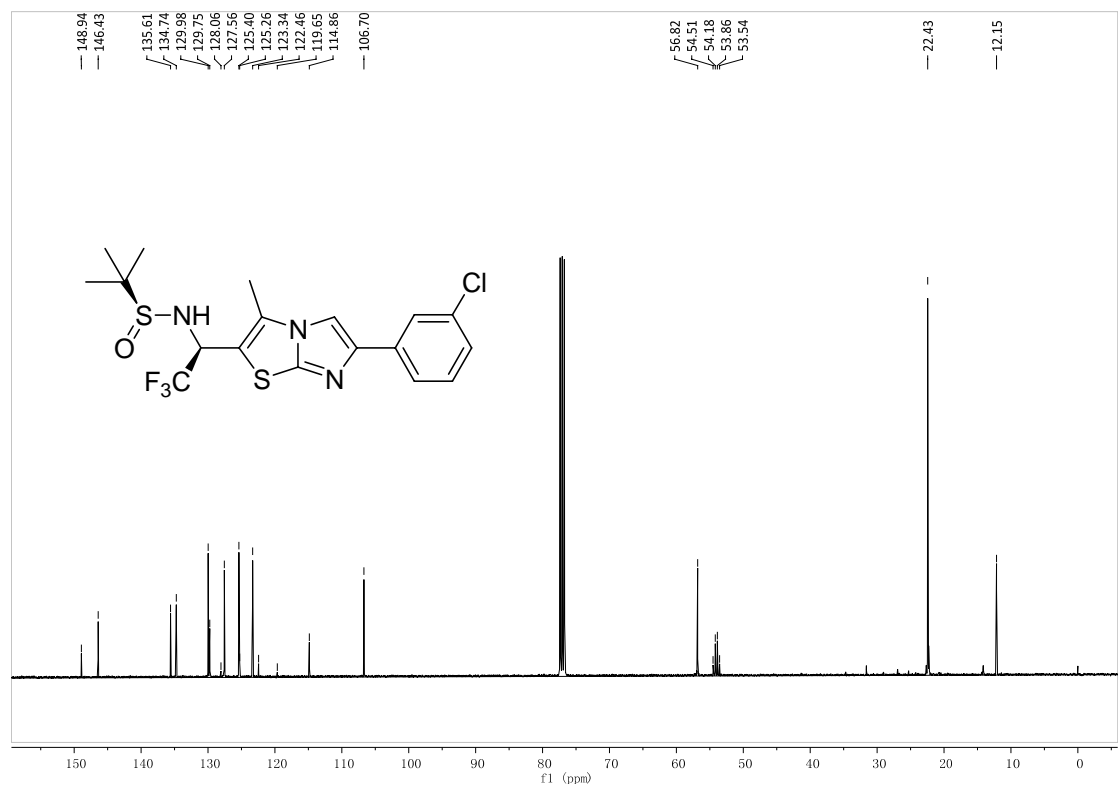

### $^1\text{H}$ and $^{13}\text{C}$ NMR of 3d

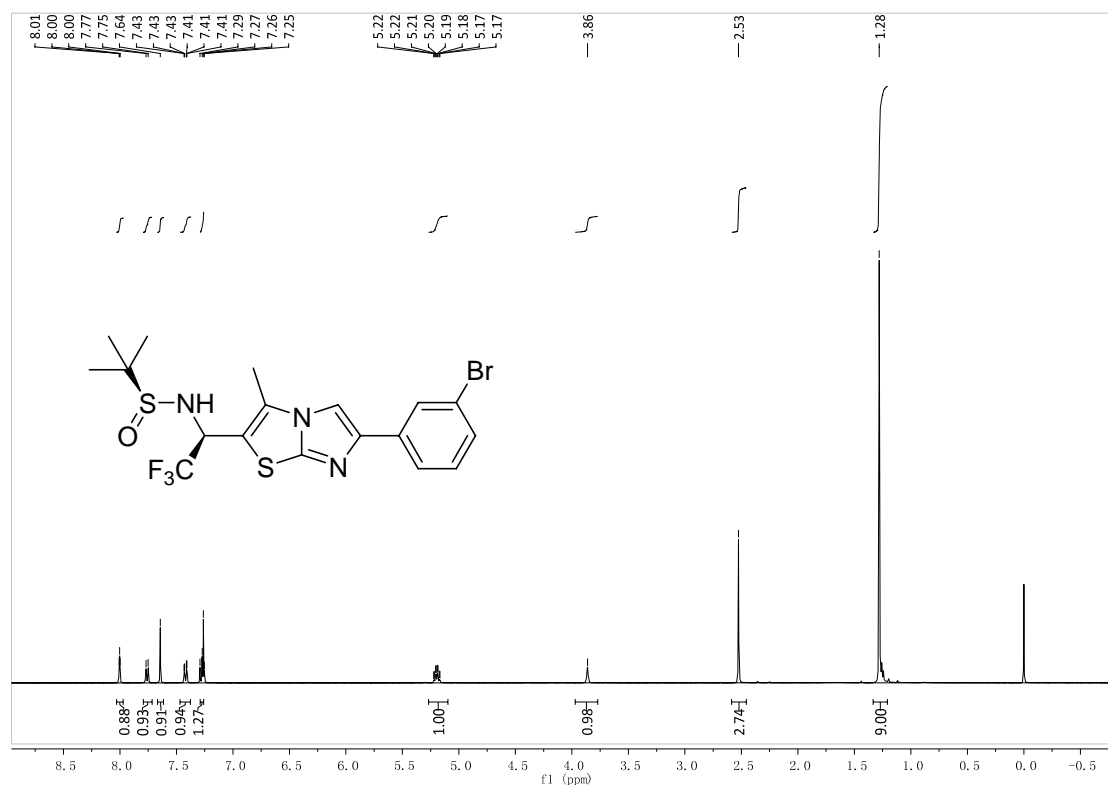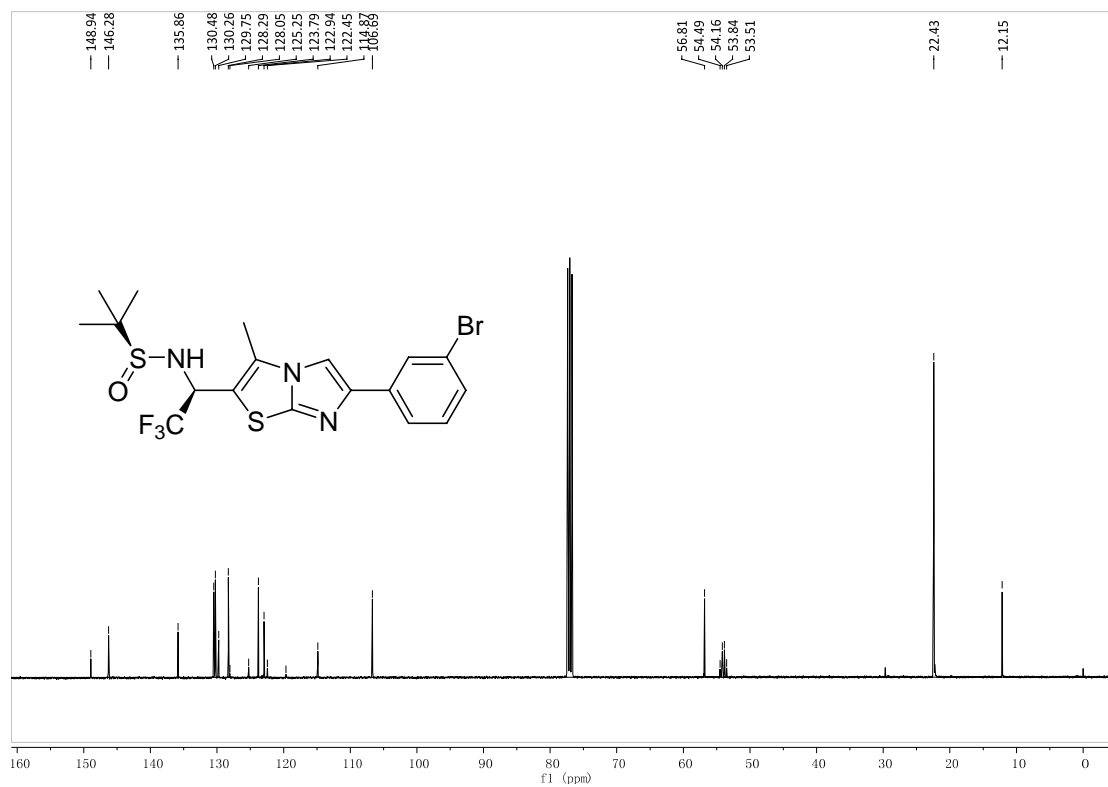

### $^1\text{H}$ and $^{13}\text{C}$ NMR of 3e

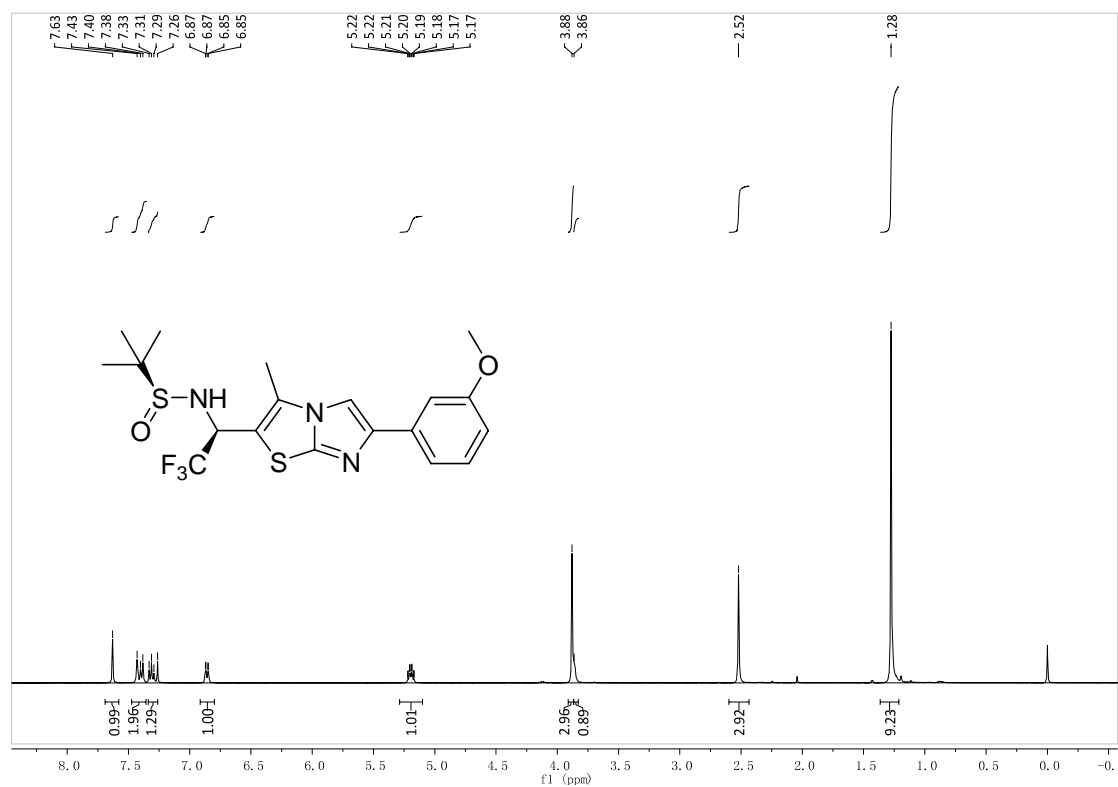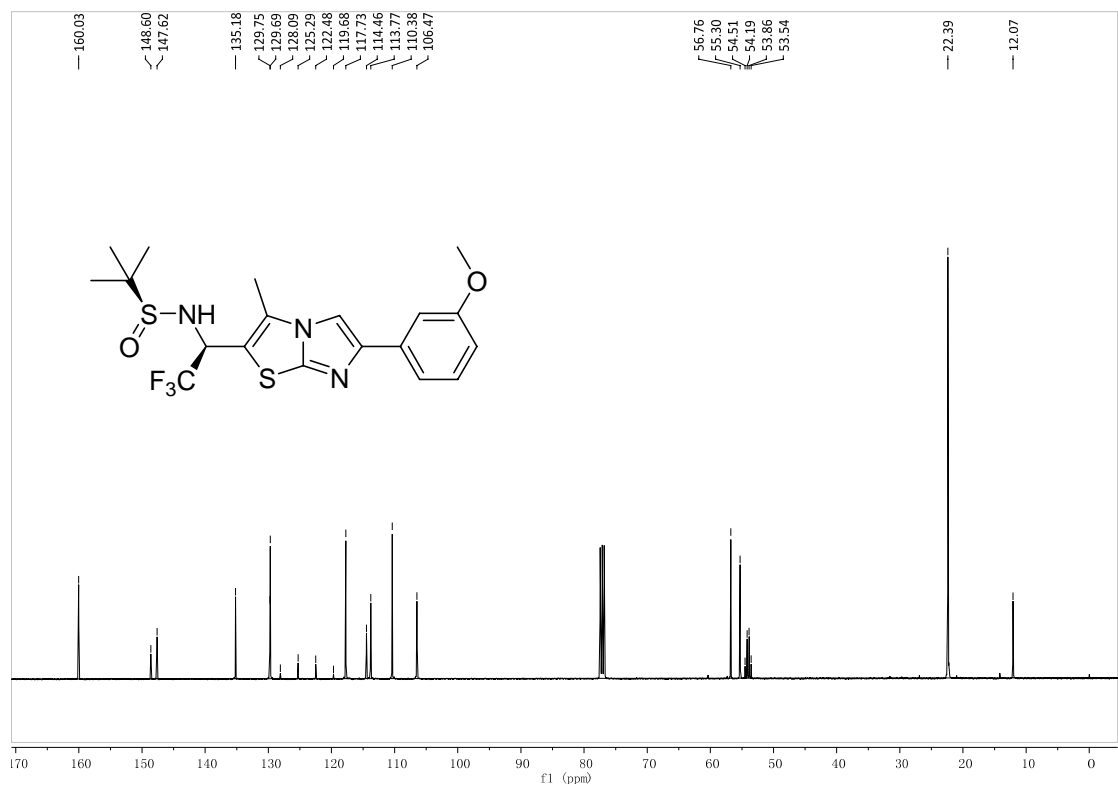

### $^1\text{H}$ and $^{13}\text{C}$ NMR of 3f

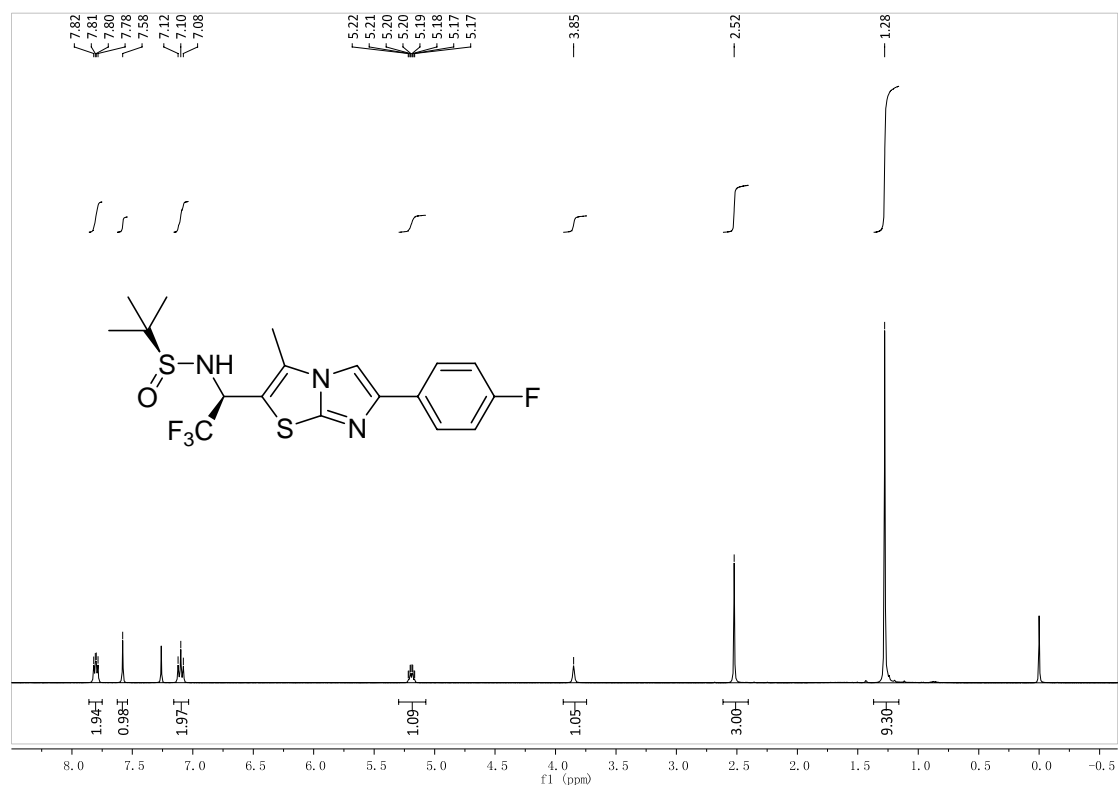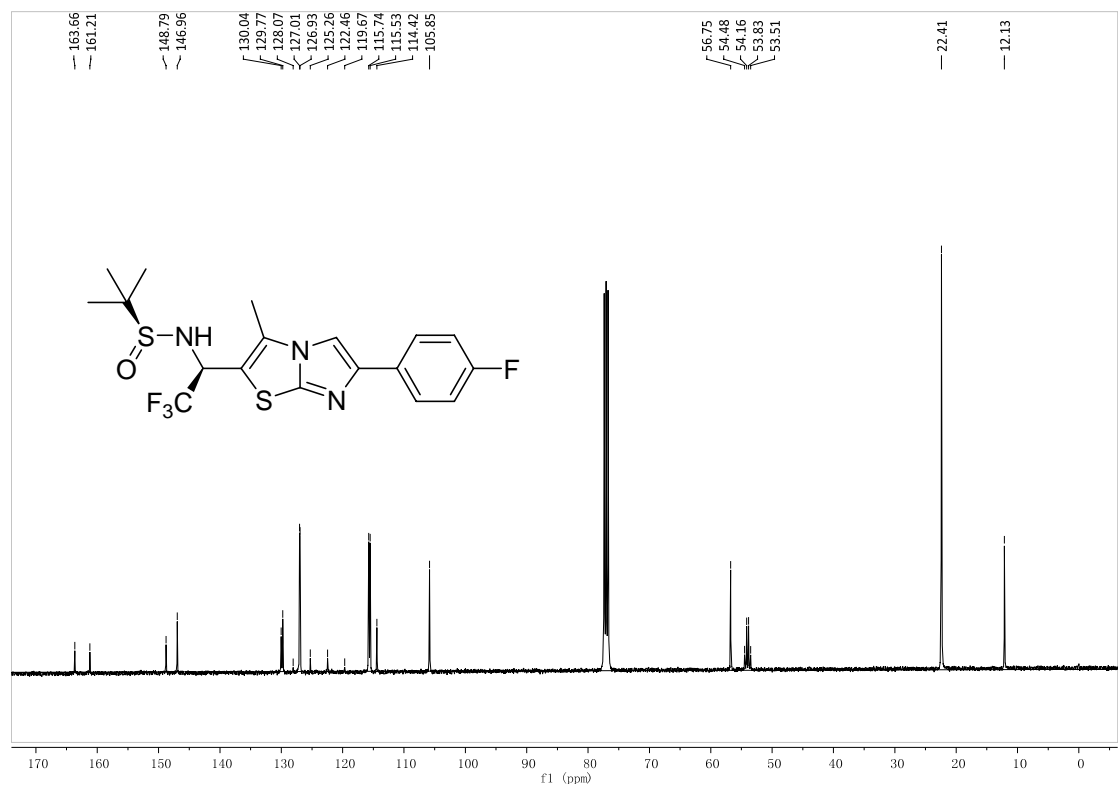

### $^1\text{H}$ and $^{13}\text{C}$ NMR of **3g**

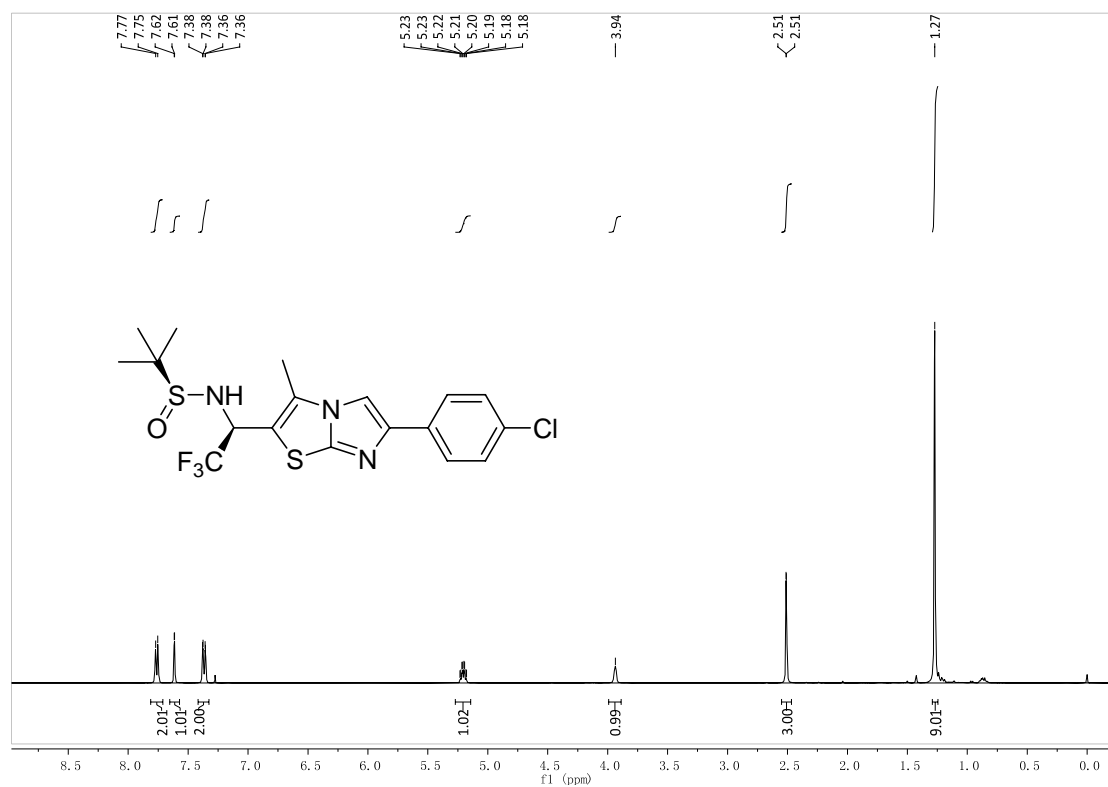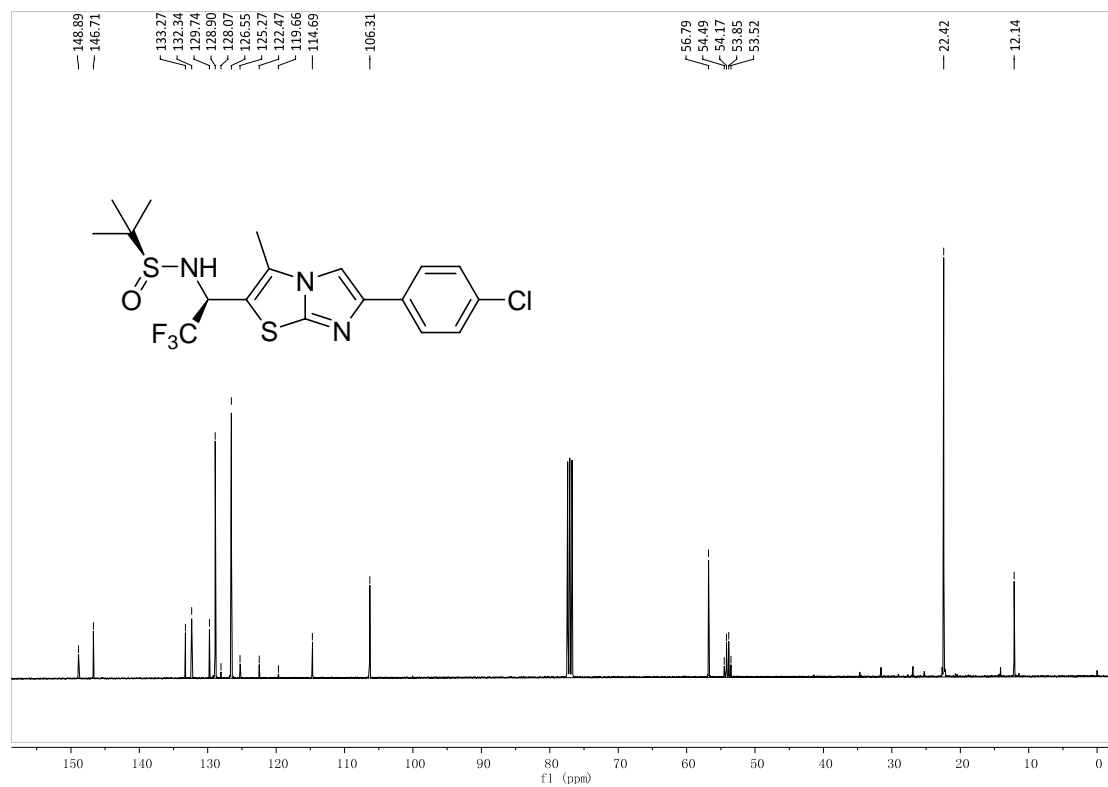



### $^1\text{H}$ and $^{13}\text{C}$ NMR of 3h

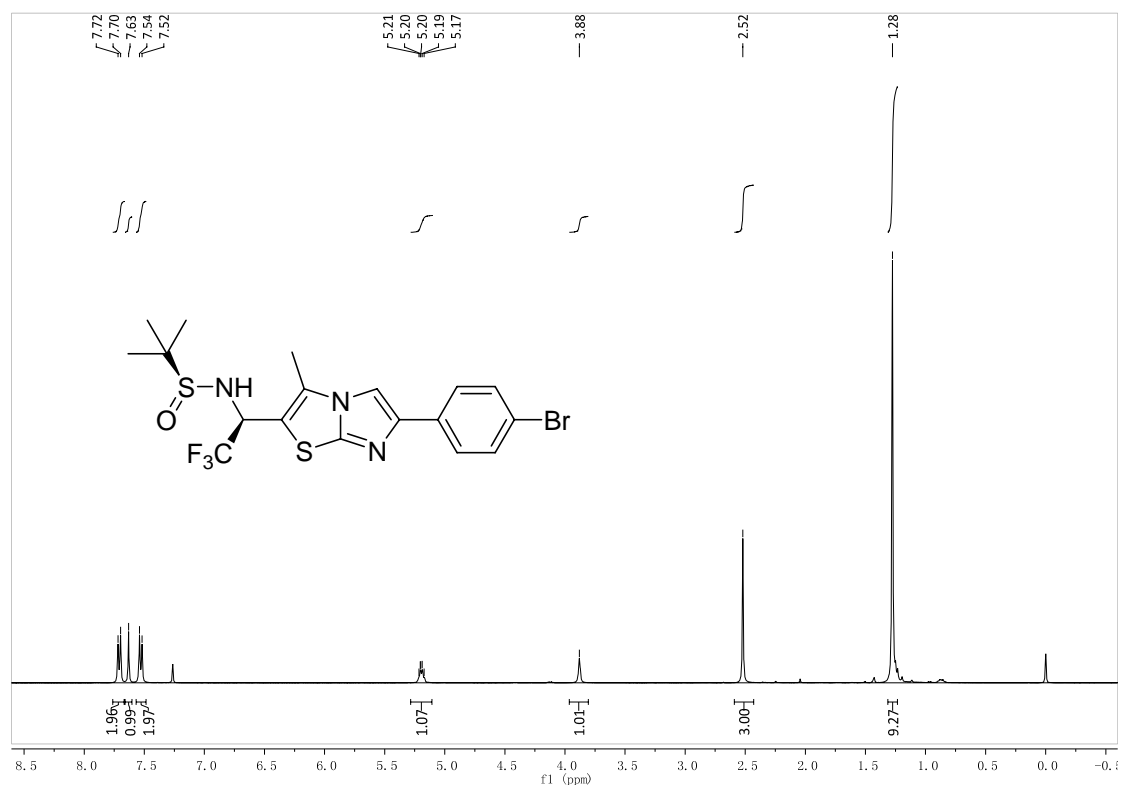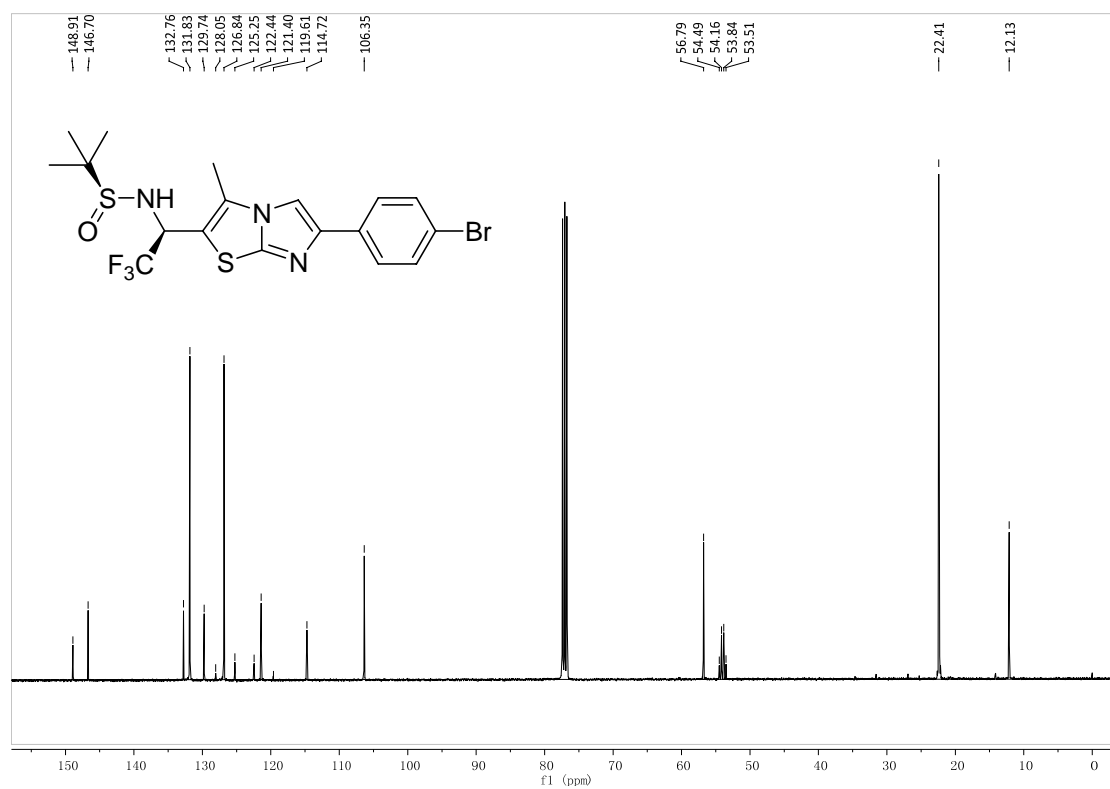

### $^1\text{H}$ and $^{13}\text{C}$ NMR of **3i**

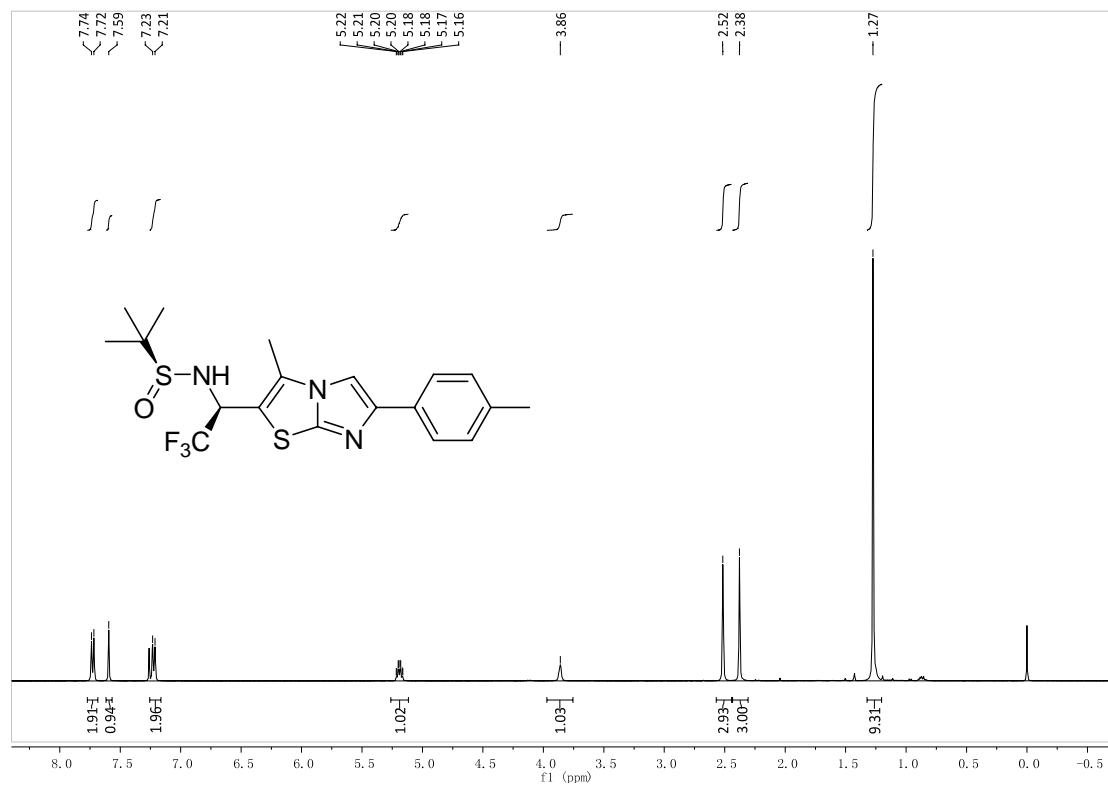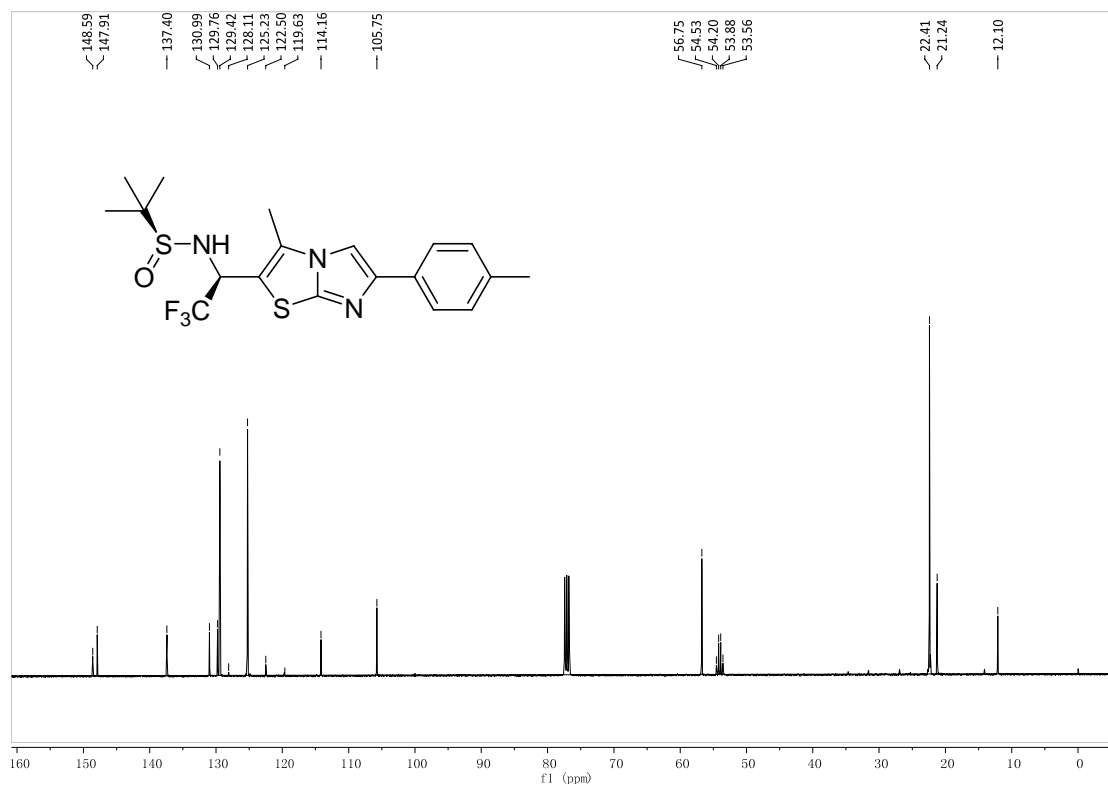

### $^1\text{H}$ and $^{13}\text{C}$ NMR of 3j

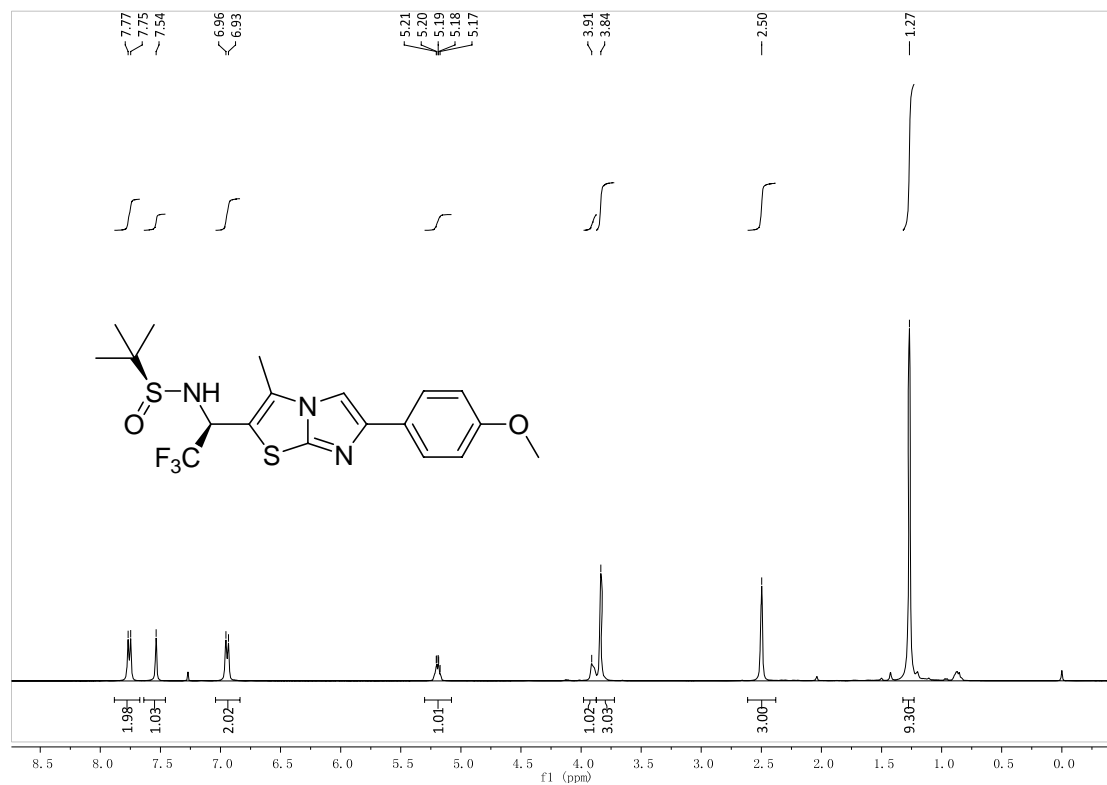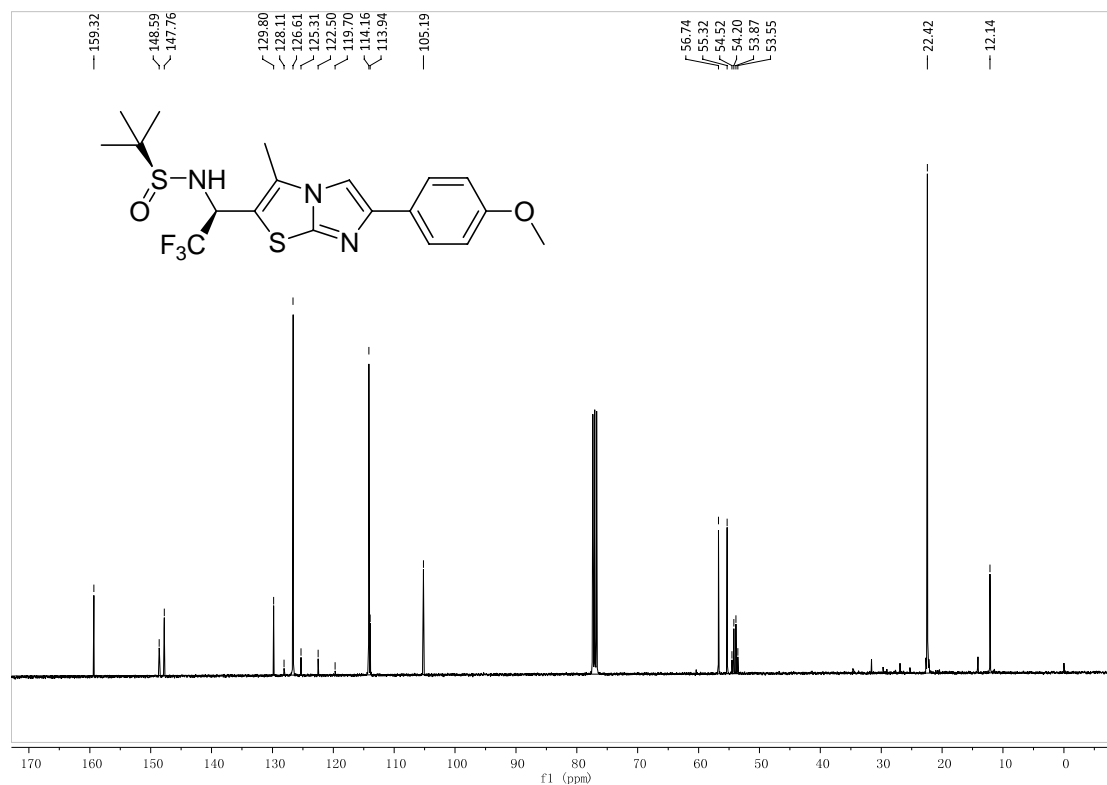

### $^1\text{H}$ and $^{13}\text{C}$ NMR of 3k

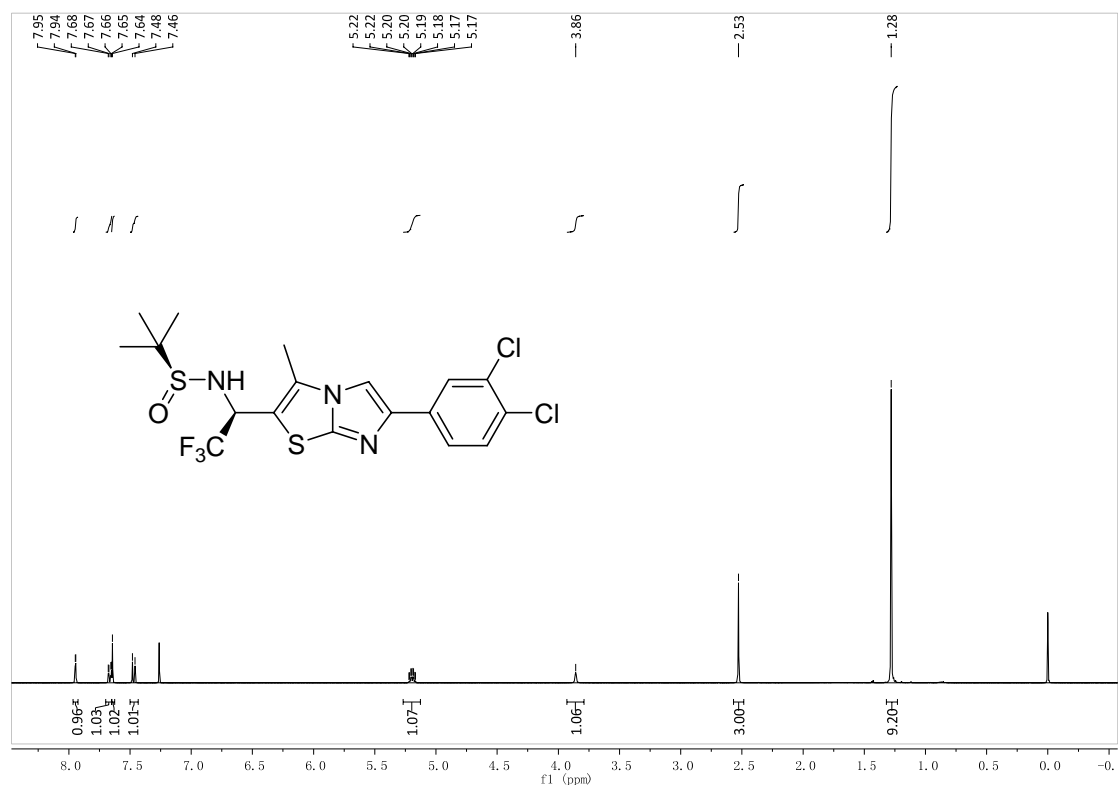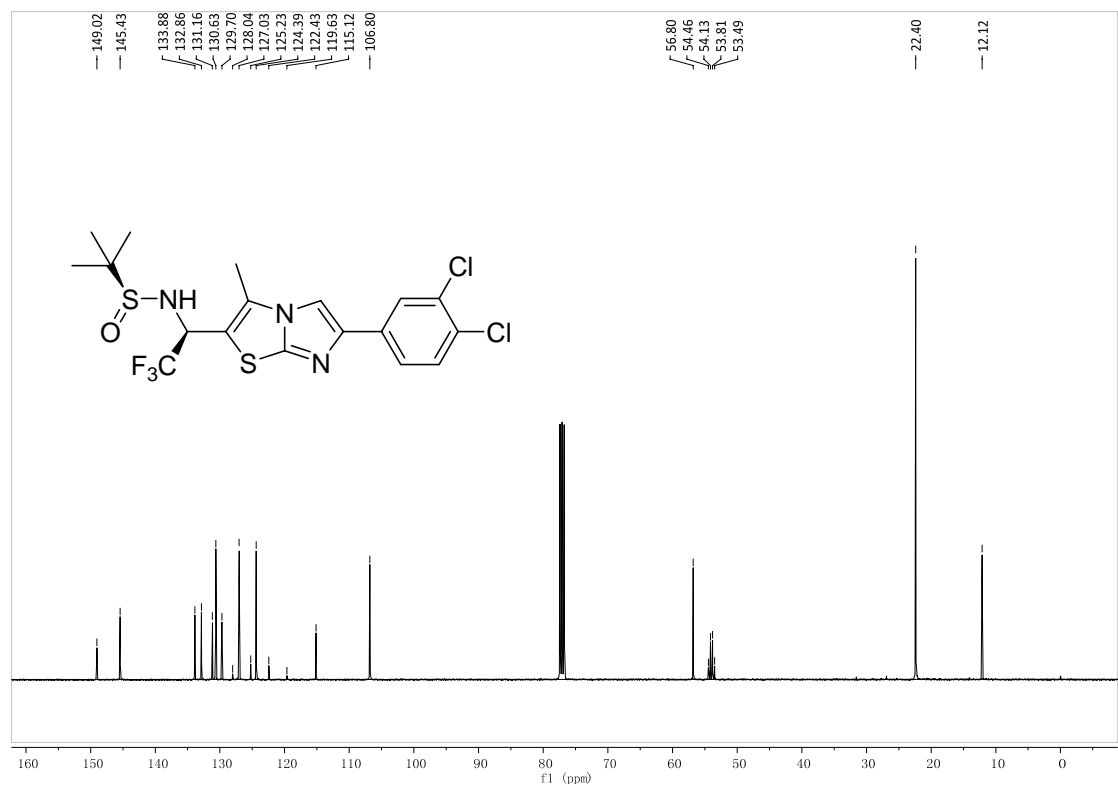

### $^1\text{H}$ and $^{13}\text{C}$ NMR of 3l

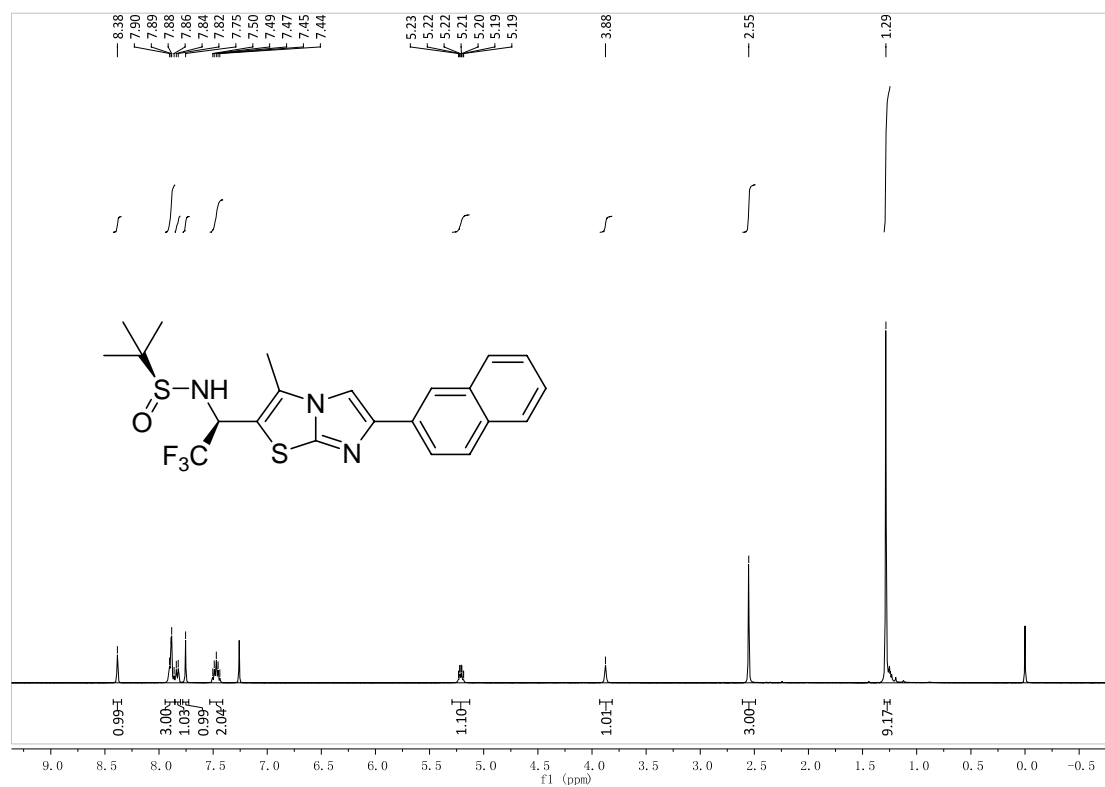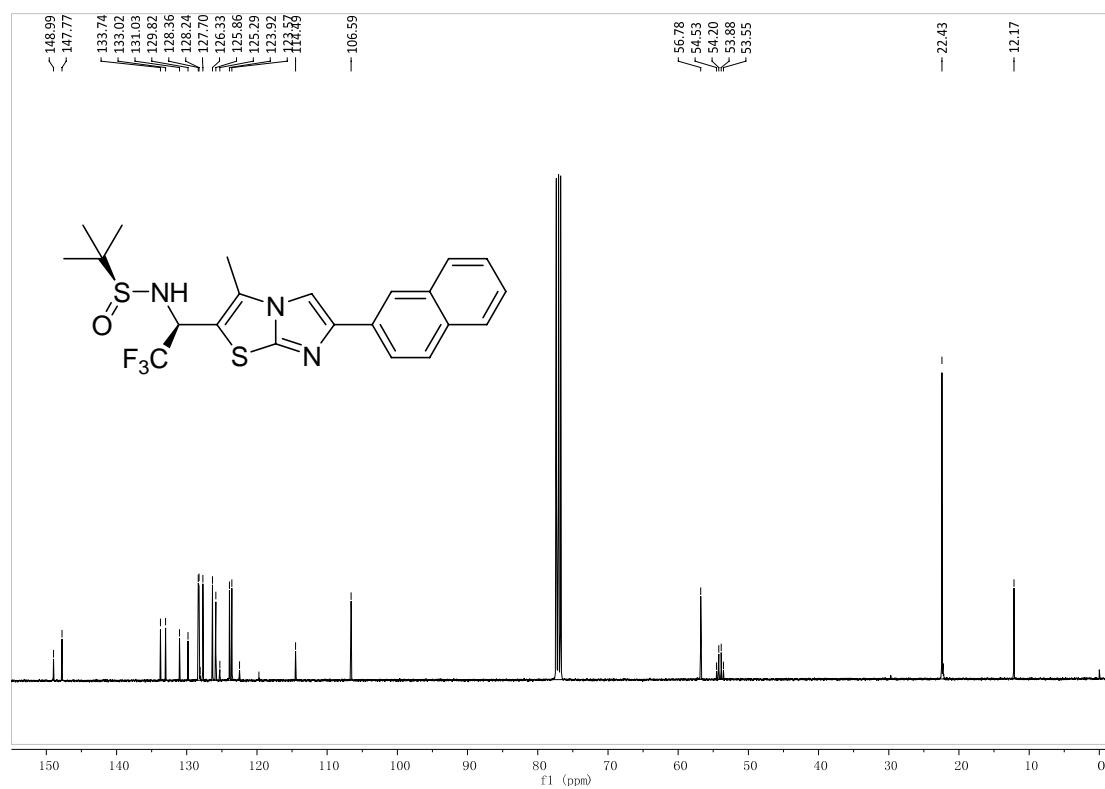

## $^1\text{H}$ and $^{13}\text{C}$ NMR of 4

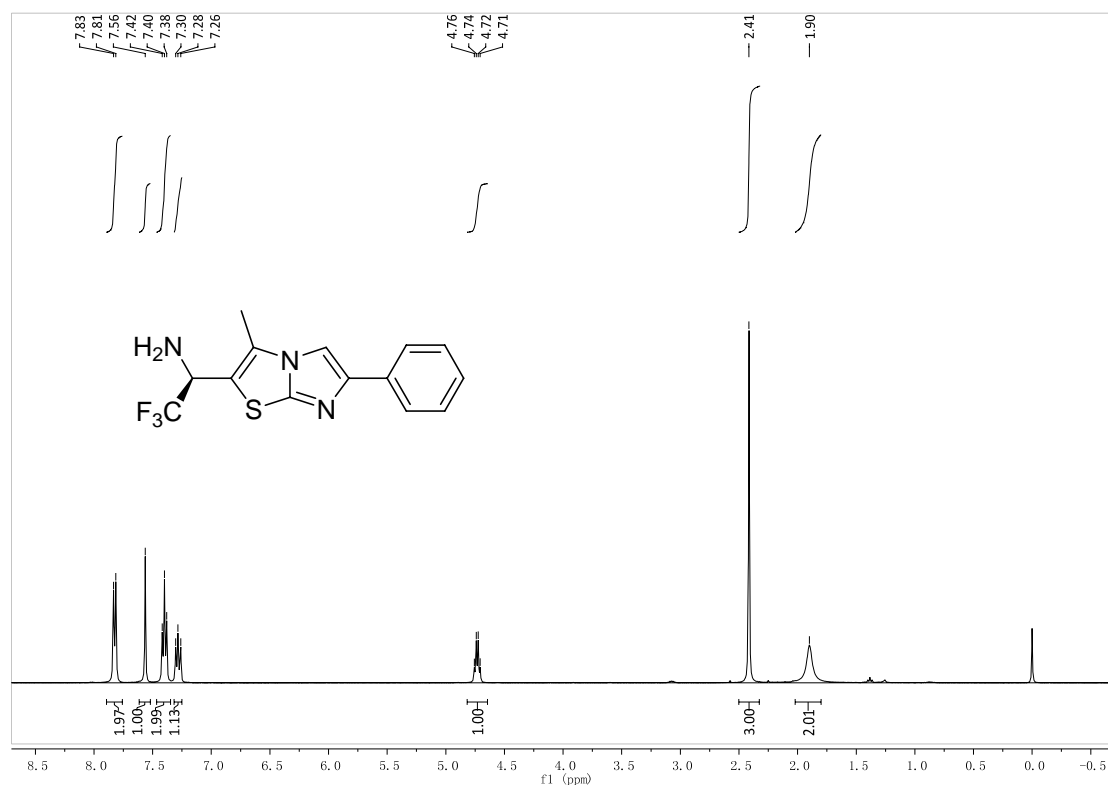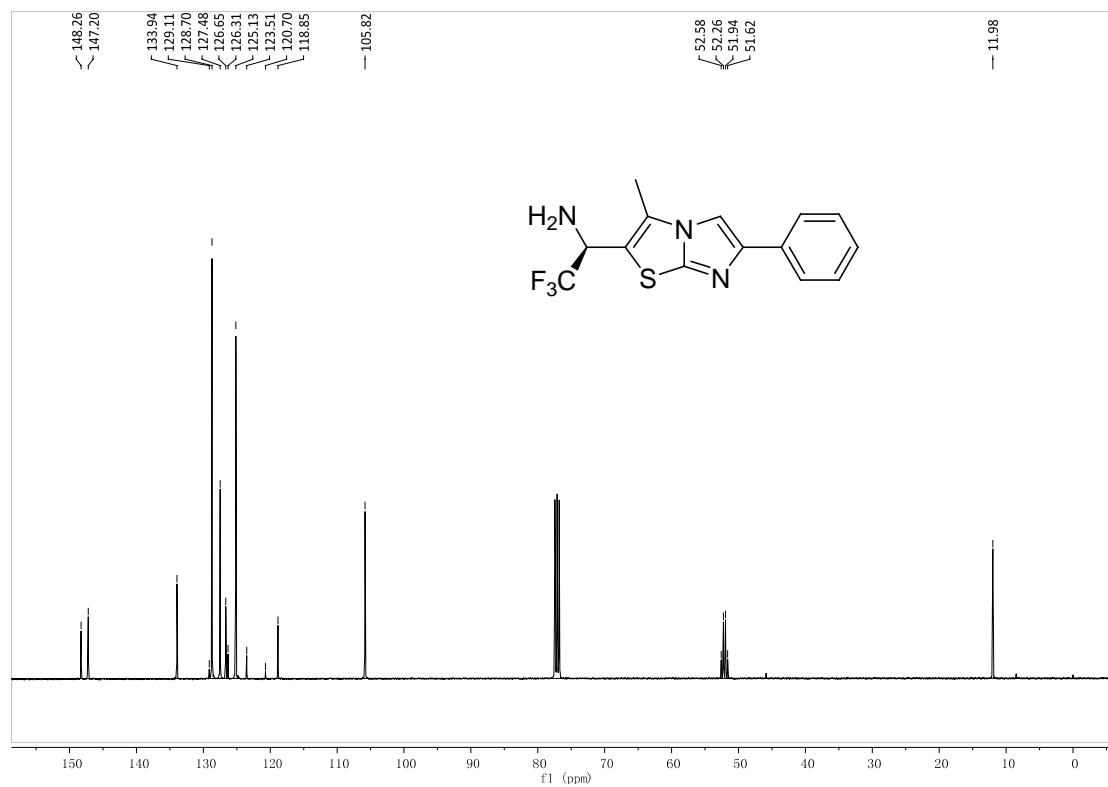

Supplement: c3ob41785a.pdf [file c3ob41785a.pdf]
